# Supplementary material for: A Smartphone-Based sEMG Signal Analysis System for Human Action Recognition
Source: MDPI journal article supplement (doi:10.3390/bios13080805), 2023-08-11
Supplement: s1 [file s1]

Supplementary Material

# A Smartphone-Based sEMG Signal Analysis System for Human Action Recognition

Shixin Yu <sup>1</sup>, Hang Zhan <sup>1</sup>, Xingwang Lian <sup>1</sup>, Sze Shin Low <sup>2</sup>, Yifei Xu <sup>1</sup>, Jiangyong Li <sup>1</sup>, Yan Zhang <sup>1</sup>, Xiaojun Sun <sup>1</sup> and Jingjing Liu <sup>1,\*</sup>

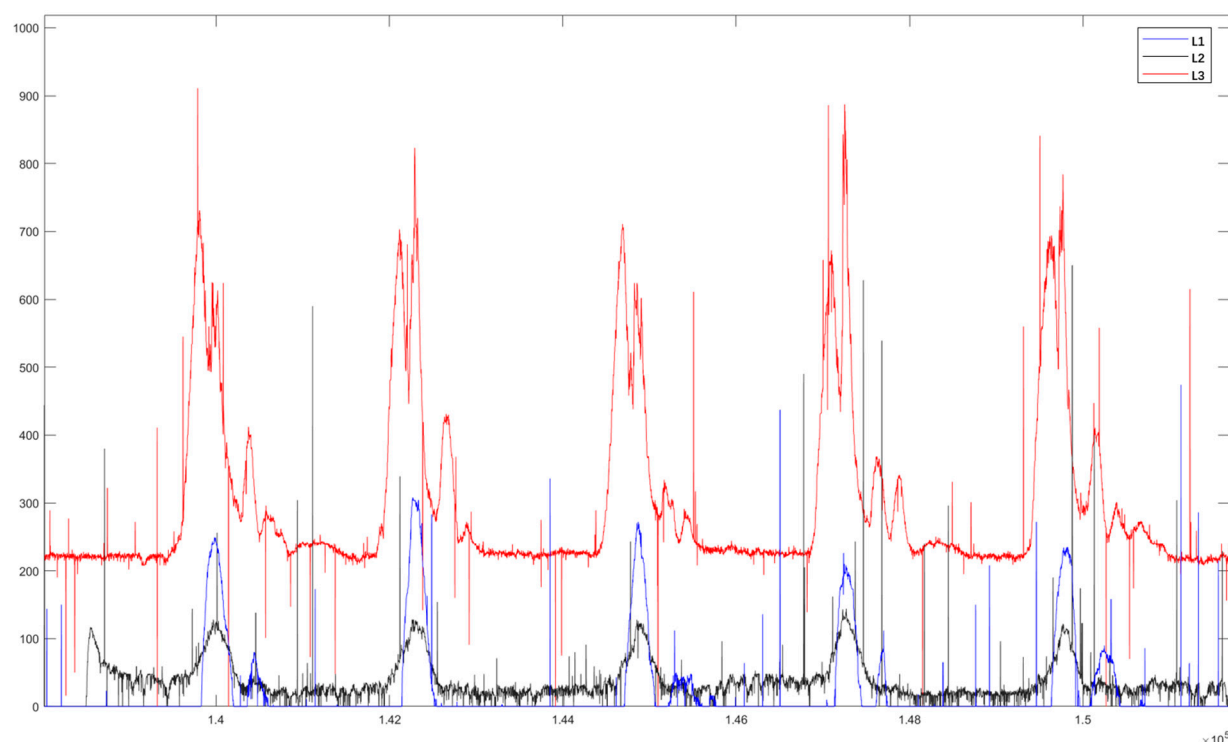

**Figure S1.** The original sEMG time-varying curve of A1 subject executing action 1 (red: response curve of sEMG at rectus femoris muscle; black: response curve of sEMG at tibialis anterior; blue: response curve of sEMG at gastrocnemius muscle).

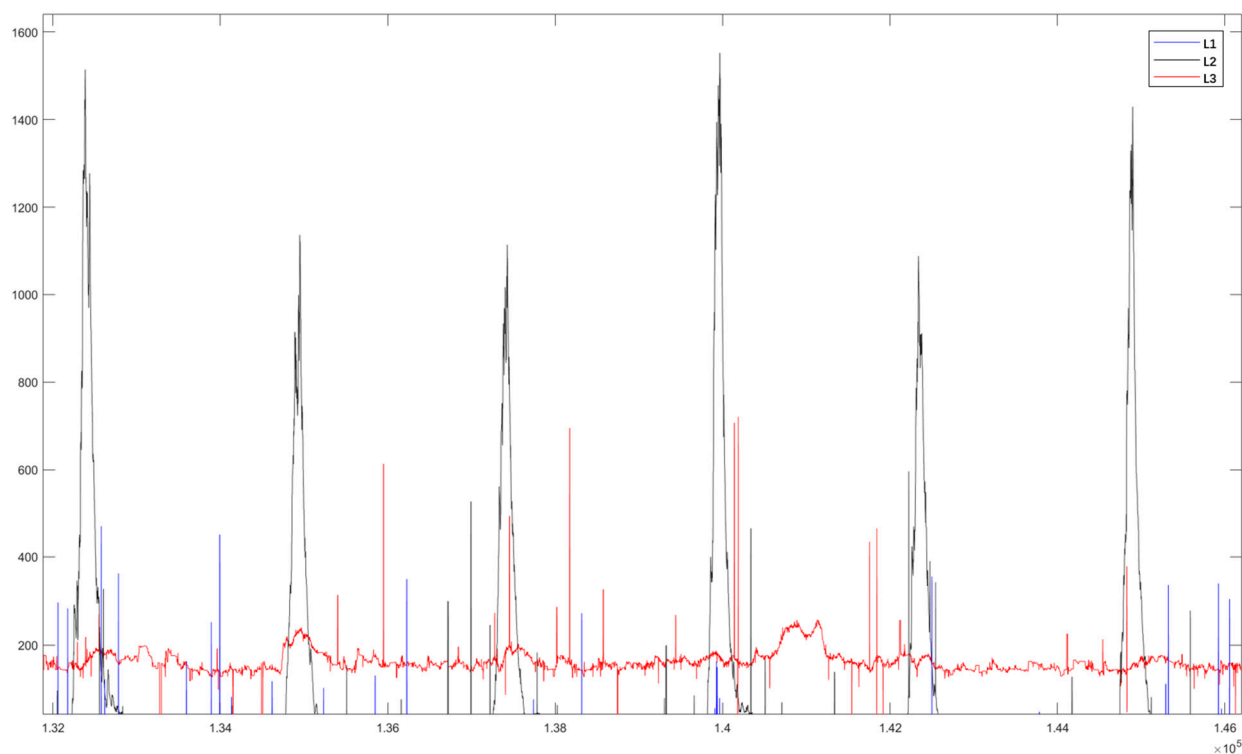

**Figure S2.** The original sEMG time-varying curve of A1 subject executing action 2 (red: response curve of sEMG at rectus femoris muscle; black: response curve of sEMG at tibialis anterior; blue: response curve of sEMG at gastrocnemius muscle).

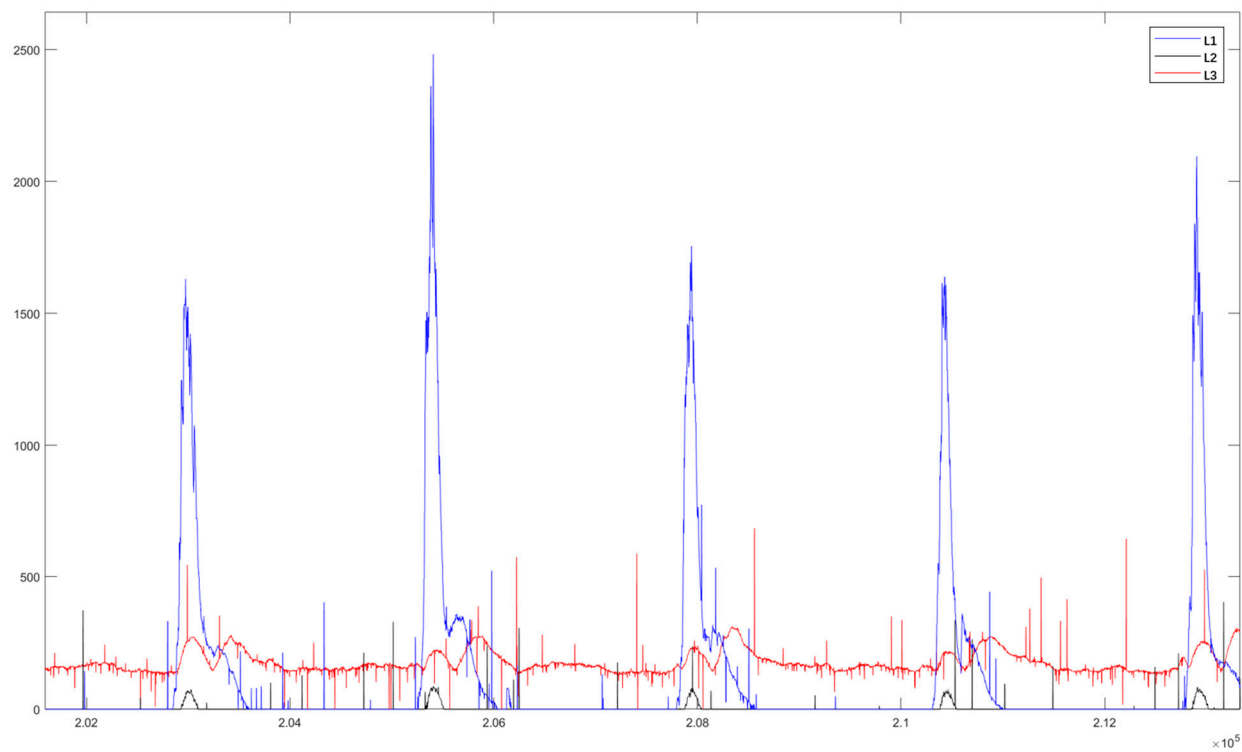

**Figure S3.** The original sEMG time-varying curve of A1 subject executing action 3 (red: response curve of sEMG at rectus femoris muscle; black: response curve of sEMG at tibialis anterior; blue: response curve of sEMG at gastrocnemius muscle).

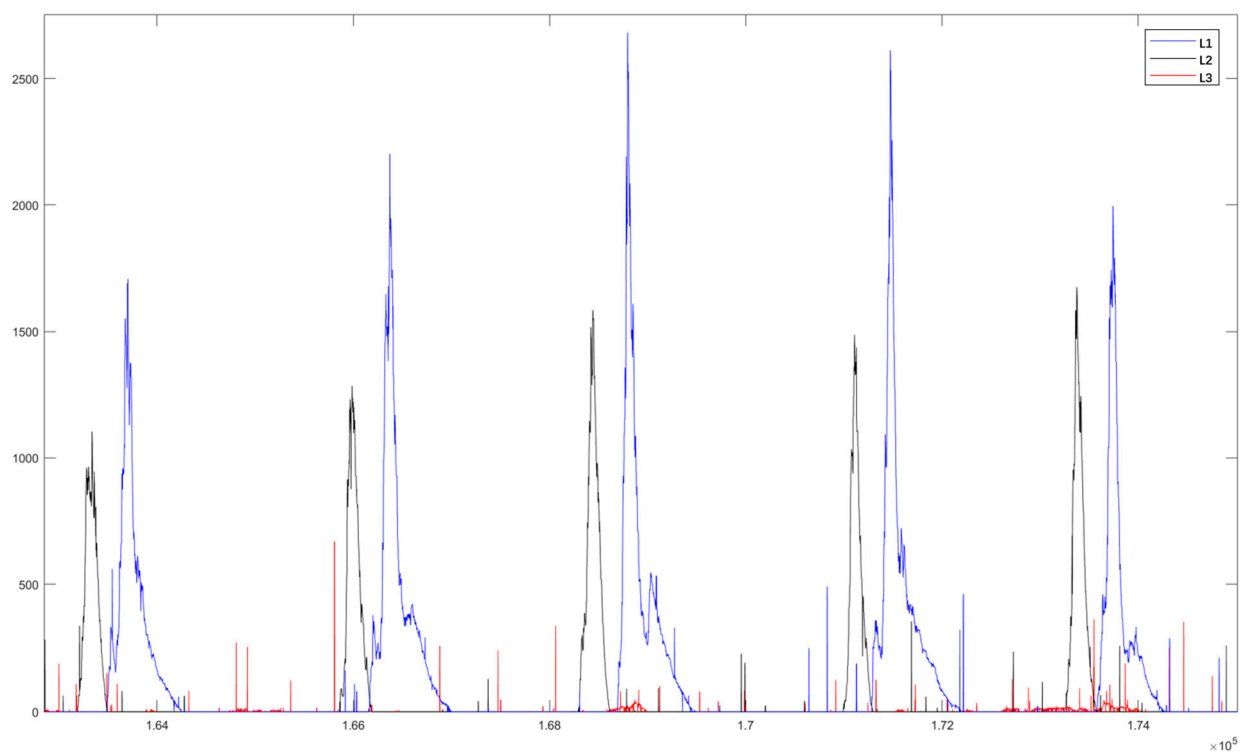

**Figure S4.** The original sEMG time-varying curve of A1 subject executing action 4 (red: response curve of sEMG at rectus femoris muscle; black: response curve of sEMG at tibialis anterior; blue: response curve of sEMG at gastrocnemius muscle).

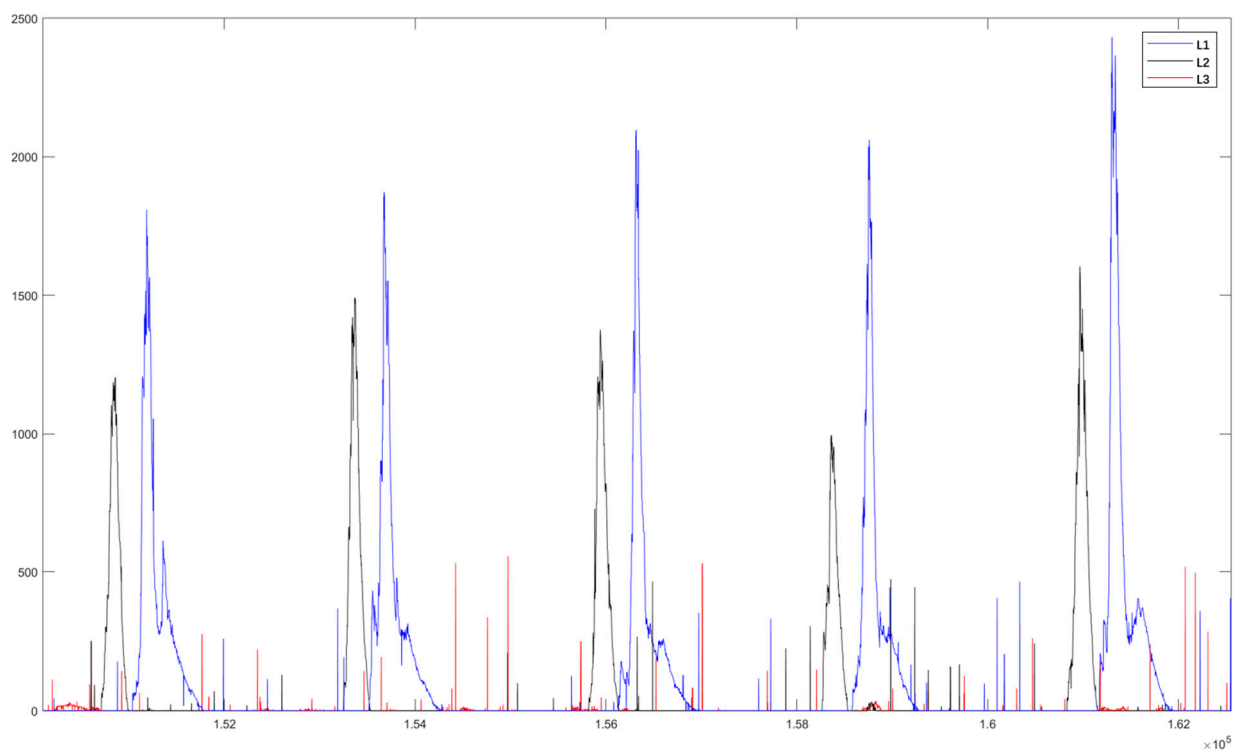

**Figure S5.** The original sEMG time-varying curve of A1 subject executing action 5 (red: response curve of sEMG at rectus femoris muscle; black: response curve of sEMG at tibialis anterior; blue: response curve of sEMG at gastrocnemius muscle).

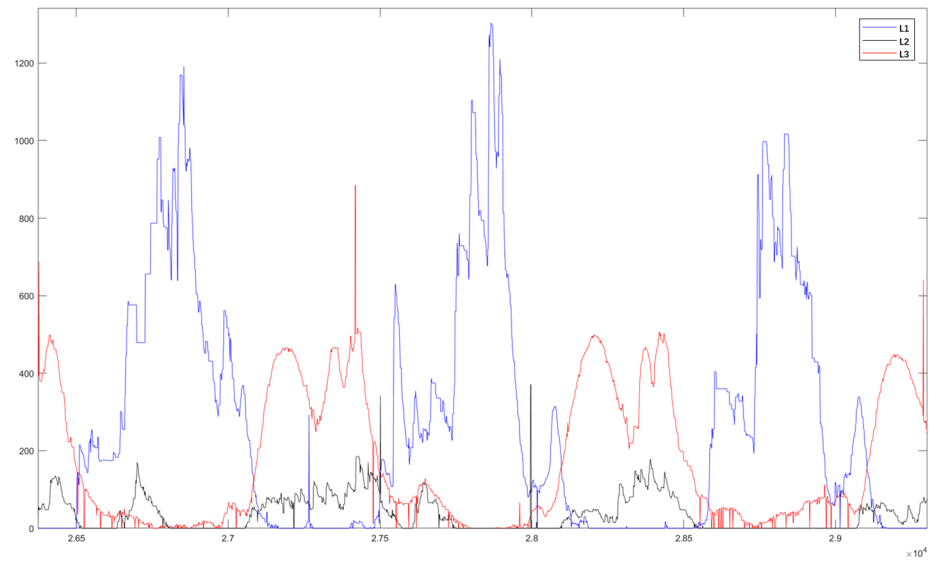

**Figure S6.** The original sEMG time-varying curve of A1 subject executing action 6 (red: response curve of sEMG at rectus femoris muscle; black: response curve of sEMG at tibialis anterior; blue: response curve of sEMG at gastrocnemius muscle).

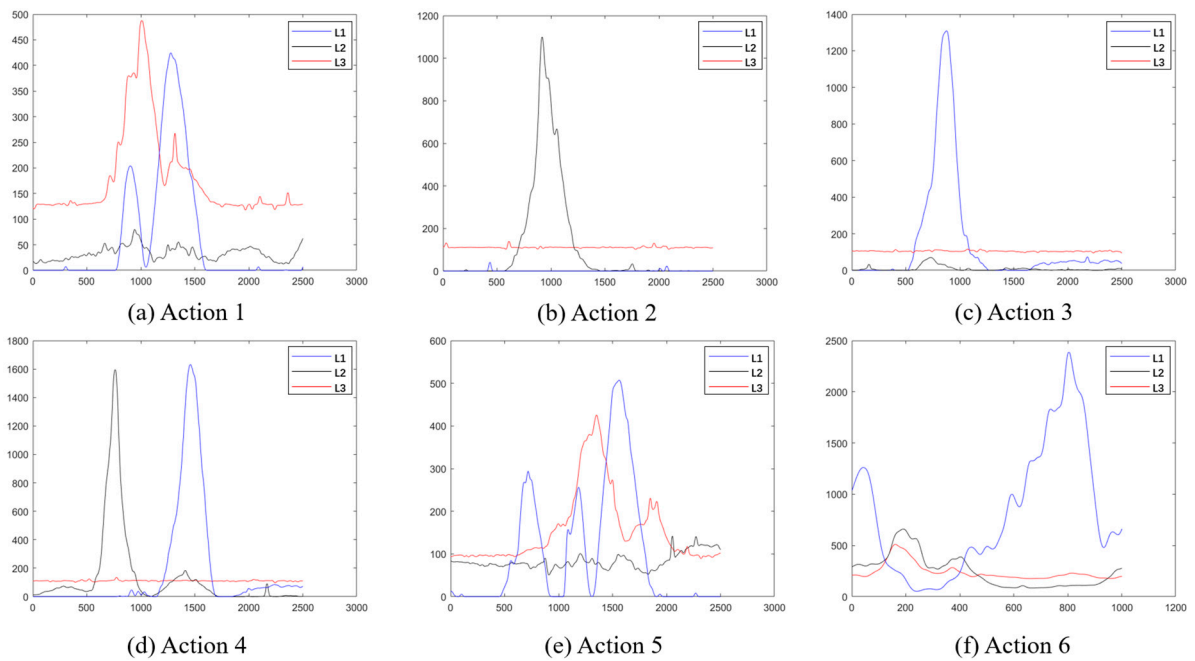

**Figure S7.** Filtered response curve of sEMG signals of subject A2 executing each action (red: response curve of sEMG at rectus femoris muscle; black: response curve of sEMG at tibialis anterior; blue: re-sponse curve of sEMG at gastrocnemius muscle).

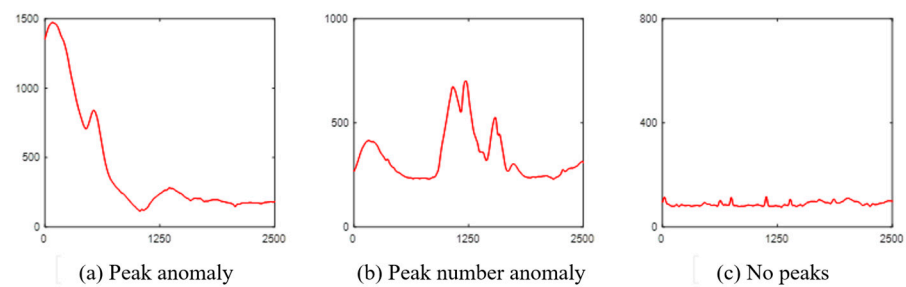

**Figure S8.** Abnormal samples waveform.
